# Supplementary material for: Hysteresis of phytoplankton communities over Sub-polar North Atlantic to CO2 forcing
Source: Copernicus journal article supplement (doi:10.5194/egusphere-2025-1474), 2025-04-17
Supplement: Supplementary file [file egusphere-2025-1474-AC2-supplement.pdf]

## Review of “Hysteresis of phytoplankton communities over Subpolar North Atlantic to CO2 forcing” by Lee et al.

### 'Comment on egusphere-2025-1474' | Anonymous Referee #1:

#### Review

This manuscript analyses climate model results of phytoplankton response in the North Atlantic. It examines a scenario of so-called “negative emissions” which implies artificial removal of CO<sub>2</sub> from the atmosphere. The authors focus on differences between a future time (around year 2200) at which CO<sub>2</sub> concentrations are back levels of ~400 ppm corresponding to approximately the year 2000 after having peaked at more than 700 ppm around year 2100. They find large differences in phytoplankton composition between those time periods, despite similar levels of CO<sub>2</sub>, and term this phenomenon “hysteresis”. The manuscript is well written and nicely illustrated and would be interesting for readers of this journal.

**Response :** We thank the referee for encouraging and insightful comments. We have carefully addressed all comments and revised the manuscript accordingly by fully incorporating the referee's suggestions.

#### Major Comments

I have two more major comments and a few minor technical suggestions. The first major comment concerns the use of the word “hysteresis” in the title and elsewhere in the manuscript. It is different from the original use in physics (electrodynamics), where it describes differences in EQUILIBRIUM states of a system for identical boundary conditions, where the differences arise only from the history of the system. It often implies thresholds that mark switching between those different states. Here, however, the system under consideration is not at equilibrium and the differences between the states are due to delays in the response. I think the use of this term (hysteresis) is not warranted in this context and suggest describing it using a different term. At least, a discussion is warranted of this issue.

**Response:** We thank you for your valuable comments. To avoid confusion for readers, we have replaced the term “hysteresis” with “irreversible shift” or “irreversible change” throughout the manuscript. Additionally, we have revised the title to “Irreversible phytoplankton community shifts over the subpolar North Atlantic to CO<sub>2</sub> forcing.”

The second major comment concerns the use of half-saturation coefficients to model nutrient uptake in their model. It would be good if the authors could clarify if the use constant half-saturation coefficients or variable ones. In the real ocean there is a variety of half-saturation coefficients depending on species and other factors and it has been argued that half-saturation values should be modeled as variable (Aumont et al. 2015). What would be the effects on the results if variable half-saturation coefficients were used, if MARBL uses constant ones?

**Response:** As the referee pointed out, in the real ocean phytoplankton half-saturation coefficients (K) vary across the phytoplankton functional types (PFTs). In CESM2's MARBL biogeochemistry model, each PFT is indeed assigned different half-saturation coefficients for each nutrient; however, these are prescribed as constant over time.

Following the referee's suggestion, we implemented the variable K approach of Aumont et al (2015) in which the effective K increases with PFT biomass and therefore varies in time as biomass changes. Specifically, we used the formulation:

$$P_1 = \min( PFT \text{ biomass}, P_{max} ) \quad (1)$$

$$P_2 = \max( 0, PFT \text{ biomass} - P_{max} ) \quad (2)$$

$$K_{variable} = K_{constant} \times \frac{P_1 + sP_{rat} \times P_2}{P_1 + P_2} \quad (3)$$

Here,  $P_{max}$  is set as  $1 \text{ mmol C m}^{-3}$  and  $sP_{rat} = 3$ , where  $sP_{rat}$  represents how much larger the half-saturation constant K is for the large size class relative to the small size class within the same PFT (Aumont et al., 2015). In other words, in line with the remarks of Aumont et al (2015), which emphasize that an increase in phytoplankton biomass is typically associated with a larger phytoplankton class, we applied a variable half-saturation coefficient under high biomass conditions. Using this approach, we reproduced nutrient limitations for diatom and small phytoplankton. Consistent with the constant-K case, we found that the temporal evolution of nutrient limitation remains qualitatively similar (**Fig. R1**). For example, although there is a slight time difference, diatom nutrient limitation shifts from Si to N during the negative emission period and reverts during the Restoring period, while small phytoplankton are predominantly N-limited with only brief iron limitation at the beginning. Thus, the results are consistent regardless of whether constant or variable half-saturation coefficients.

Following the referee's suggestion, we explicitly stated in the manuscript that constant half-saturation coefficients are used in MARBL as below:

(163-166): Within MARBL—the biogeochemical component of the CESM2 Earth System Model—the advantage of smaller phytoplankton in low-nutrient environments is represented by prescribing different constant half-saturation coefficients for each PFT, reflecting the observed differences among phytoplankton size classes in the real ocean.

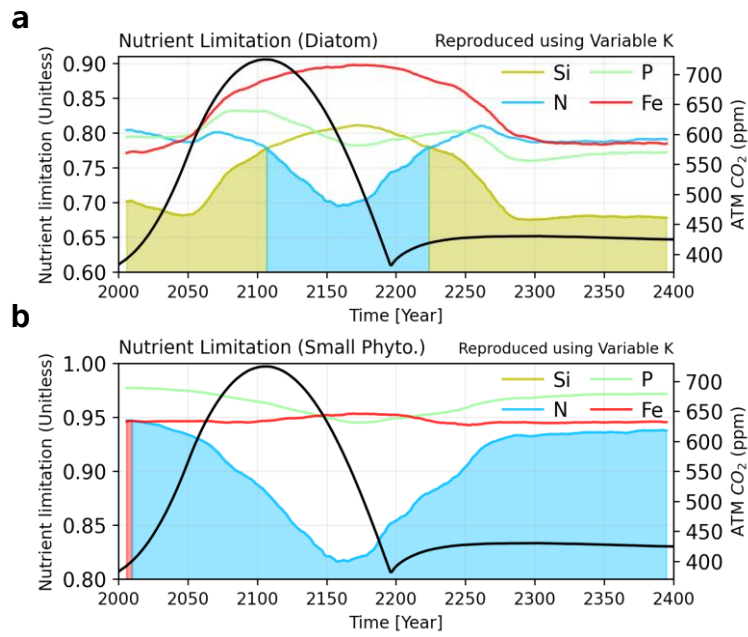

**Figure R1.** Nutrient limitation of **a**, diatom and **b**, small phytoplankton for four nutrients (SiO<sub>3</sub>; dark-khaki, Nitrogen (N); blue, Phosphorus (P); light-green, Iron (Fe); red). All plots are drawn in 11-year moving averages and the shading indicates the primary limiting nutrients for each phytoplankton functional types.

### Line by line comments

Line 166: "... *thereby promoting the growth of small phytoplankton.*" I think this would also apply to diatoms, right? If so, remove "small".

**Response:** Corrected.

84: "SO" explain acronym

**Response:** Corrected.

93: replace "Leibig" with "Liebig"

**Response:** Corrected.

96: Long reference is repeated.

**Response:** Corrected.

180: "(NO<sub>3</sub>, SiO<sub>3</sub>)" What about PO<sub>4</sub>? Is it also decreasing? Is it modeled separately? I assume it could affect diazotrophs, who may be P limited.

**Response:** Both during the CO<sub>2</sub> increasing & decreasing period, surface PO<sub>4</sub> concentrations decrease continuously across the entire SPNA region and begin to recover shortly before the end of the negative-emission phase, similar to changes in NO<sub>3</sub> (**Fig R2**). Therefore, this result is consistent with the changes in P limitation values for both diatom and small phytoplankton shown in Fig. 3b and Fig. S5. As the referee mentioned, this PO<sub>4</sub> decline can affect diazotroph growth, which is not affected by N and Si, with sustained surface cooling due to the weakening of the AMOC strength.

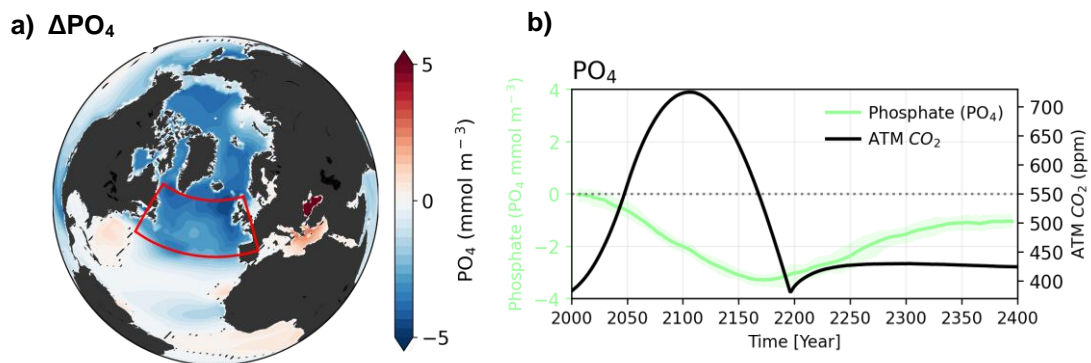

**Figure R2.** **a**, Difference in Phosphate ( $\text{PO}_4$ ) between  $\text{CO}_2$  down and climatology periods. **b**, Time series of changes in  $\text{PO}_4$  (light-green) and atmospheric  $\text{CO}_2$  concentration (black) compared to initial level (2001-year). The plot is drawn in 11-year moving averages and the shading indicates the minimum-maximum values between total ensembles.

186: "reported" by whom?

**Response:** Corrected.

208-209: but in SPNA it shifts from Fe limitation to N-limitation

**Response:** In the time-series (Fig. S5a), we show how the mean limitation values for each nutrient—averaged over the whole SPNA region. In contrast, the spatial maps (Figs. S5b-c) highlight the nutrient with the lowest values at each grid point as the nutrient limitation for that grid, indicating that iron (Fe) limitation may be more widespread in the SPNA region. However, when limitation values are averaged across SPNA region, N limitation dominant from the present climate period through the entire experimental period.

243-246, 274: the SPNA is a relatively small region of the global ocean. How much does global EP decrease and what is the contribution of the SPNA to it?

250-251: related to previous comment. This effect may not be large enough to affect atmospheric  $\text{CO}_2$  significantly.

**Response:** Although the SPNA region covers only a relatively small area of the global ocean, it represents one of the most efficient regional biological carbon pump (Falkowski et al., 1998). During the Climatology period, the its area-averaged POC export flux is ~1.5 times higher the global mean. Quantitatively, although the SPNA occupies <2% of the global ocean area, SPNA region ( $1.29 \times 10^{16} \text{ mmol C yr}^{-1}$ ) contributes  $2.87 \pm 0.04\%$  of the global ocean ( $4.49 \times 10^{17} \text{ mmol C yr}^{-1}$ ) POC export flux. In addition, strong AMOC-driven deep convection in this region enhances the downward transport and sequestration of organic carbon into the deep ocean, so despite its limited spatial extent the SPNA exerts a great contribution to global export production and long-term carbon sequestration.

Additionally, the irreversible shift toward smaller phytoplankton in the SPNA reduces the region's carbon sequestration capacity, which can locally intensify ocean acidification and thereby exert biological stress on calcifying organisms (e.g., coral reefs). Beyond its biogeochemical implications, such changes in phytoplankton community structure can also affect regional fisheries, with cascading socio-economic affects for neighboring countries.

259-260: Not sure this is the whole reason, since diazotrophs also decrease in the subtropical North Atlantic where SSTs do not decrease.

**Response:** The strong decline of diazotrophs is primarily driven by temperature limitation in the SPNA region because diazotrophs cannot survive at temperatures below  $\sim 15^\circ\text{C}$  (Long et al., 2021). Therefore, the persistent AMOC-driven SST cooling reduces the extent of habitable region above this threshold. This explains the substantial decline in diazotrophs across the SPNA. In addition, suppressed nutrient availability can decline the diazotroph concentrations as well.

In contrast, the subtropical North Atlantic remains sufficiently warm that temperature is not a limiting factor. In this region, diazotrophs are instead regulated by nutrient availability. Unlike other phytoplankton groups, diazotrophs are not limited by nitrate ( $\text{NO}_3$ ) or silicate ( $\text{SiO}_3$ ); rather, they are affected by phosphate ( $\text{PO}_4$ ) and iron (Fe) supply.

To avoid confusion for readers, we have clarified in the revised text that, in addition to temperature limitation, the role of suppressed nutrient availability as a secondary factor has also been stated.

(263-265): The diazotroph concentrations significantly decrease, primarily reflecting the response to oceanic temperature changes, while suppressed nutrient availability contributes as well

268: why is nutrient recovery delayed?

**Response:** Previous studies have suggested that global warming leads to a weakening of the nutrient cycle, particularly through enhanced Southern Ocean (SO) productivity that intensifies nutrient trapping in the deep ocean and drives a global nutrient decline (Moore et al., 2018; Laufkötter and Gruber, 2018). Such large-scale nutrient redistribution is sustained even under the negative emissions (**Fig. R3**). Therefore, it implies that even when the AMOC begins to recover during the CO<sub>2</sub> decreasing period, the amount of nutrients supplied from the Southern Hemisphere and lower latitudes remains reduced compared to the climatology period.

In addition, during the weakened AMOC phase, the mixed layer depth (MLD) in the SPNA region remains in a shutdown state, and its recovery requires sufficient salt-advection associated with AMOC strengthening (Oh et al., 2022). Therefore, the MLD can begin to recover after the salt-advection has sufficiently accumulated. As a result, the recovered nutrient levels stay below the climatological state, giving rise to the delayed recovery.

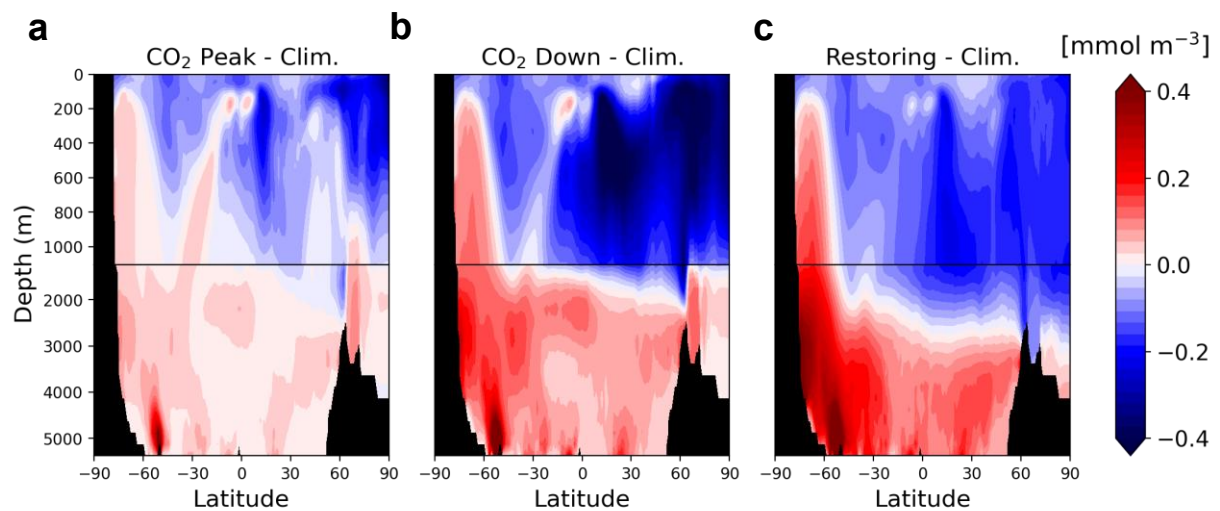

**Figure R3.** Zonally averaged differences in the vertical profile of dissolved inorganic phosphate (PO<sub>4</sub>) between the Climatology and **a**, CO<sub>2</sub> peak, **b**, CO<sub>2</sub> Down, and **c**, Restoring period.

273-274: should it be “positive” rather than “negative” feedback?

**Response:** Corrected.

281-283: It may be worthwhile to note here that the GFDL model does not exhibit "hysteresis"

**Response:** While it is true that diatom concentrations almost return to their initial values after CO<sub>2</sub> is decreased to the initial level, our analysis indicates that the pathway during the CO<sub>2</sub> Ramp-down period does not follow the same pathway as the CO<sub>2</sub> Ramp-up period, indicating the hysteresis.

This is evident in the scatter plot, plotting diatom concentrations directly against atmospheric CO<sub>2</sub> (**Fig. R4**), which shows a clear separation between the Ramp-up and Ramp-down periods. Therefore, we interpret this as evidence of a hysteresis response in the GFDL-ESM4 model, even though the end state after CO<sub>2</sub> recovery appears close to the initial state.

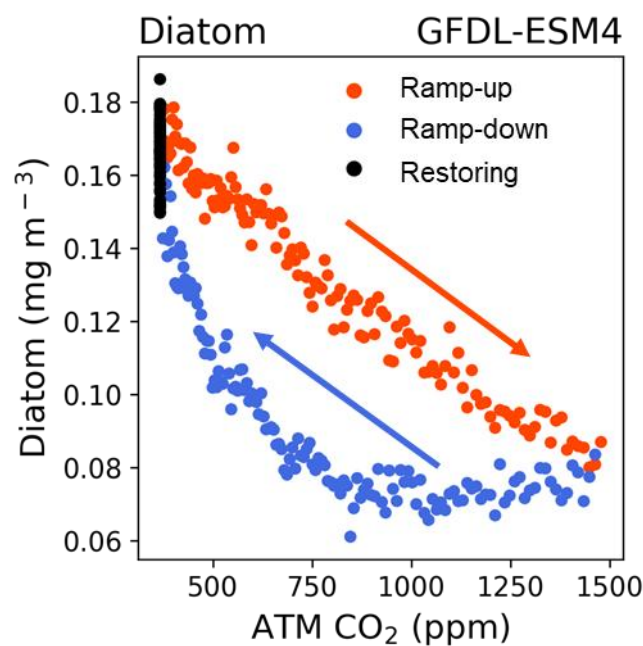

**Figure R4.** Changes in SPNA area-averaged diatom concentrations (y-axis) corresponding to global mean atmospheric CO<sub>2</sub> concentration (x-axis). The colors in scatters indicate the 3 periods (CO<sub>2</sub> Ramp-up period; orange, CO<sub>2</sub> Ramp-down period; blue, Restoring; black).



## Reference

Aumont, O., Ethé, C., Tagliabue, A., Bopp, L., and Gehlen, M.: PISCES-v2: An ocean biogeochemical model for carbon and ecosystem studies, *Geosci. Model Dev.*, 8, 2465–2513, <https://doi.org/10.5194/gmd-8-2465-2015>, 2015.

Falkowski, P. G., Barber, R. T., and Smetacek, V.: Biogeochemical controls and feedbacks on ocean primary production, *Science (80-. )*, 281, 200–206, <https://doi.org/10.1126/science.281.5374.200>, 1998.

Keith Moore, J., Fu, W., Primeau, F., Britten, G. L., Lindsay, K., Long, M., Doney, S. C., Mahowald, N., Hoffman, F., and Randerson, J. T.: Sustained climate warming drives declining marine biological productivity, *Science (80-. )*, 359, 113–1143, <https://doi.org/10.1126/science.aao6379>, 2018.

Laufkötter, C. and Gruber, N.: Will marine productivity wane?, *Science (80-. )*, 359, 1103–1104, <https://doi.org/10.1126/science.aat0795>, 2018.

Long, M. C., Moore, J. K., Lindsay, K., Levy, M., Doney, S. C., Luo, J. Y., Krumhardt, K. M., Letscher, R. T., Grover, M., and Sylvester, Z. T.: Simulations With the Marine Biogeochemistry Library (MARBL), *J. Adv. Model. Earth Syst.*, 13, <https://doi.org/10.1029/2021MS002647>, 2021.

Oh, J. H., An, S. Il, Shin, J., and Kug, J. S.: Centennial Memory of the Arctic Ocean for Future Arctic Climate Recovery in Response to a Carbon Dioxide Removal, *Earth's Futur.*, 10, <https://doi.org/10.1029/2022EF002804>, 2022.
